# Supplementary material for: Cl@Si20X20 cages: evaluation of encapsulation nature, structural rigidity, and 29Si-NMR patterns using relativistic DFT calculations
Source: Royal Society of Chemistry journal article supplement (doi:10.1039/d3cp02371k), 2023-01-01
Supplement: d3cp02371k1.pdf [file d3cp02371k1.pdf]

-- Supporting information for --

# **Cl@Si<sub>20</sub>X<sub>20</sub> cages. Evaluation of Encapsulation Nature, Structural Rigidity, and <sup>29</sup>Si-NMR Patterns from Relativistic DFT Calculations**

Desmond MacLeod-Carey,<sup>a</sup> Peter L. Rodríguez-Kessler,<sup>b,\*</sup> and Alvaro Muñoz-Castro<sup>c,\*</sup>

<sup>a</sup>Laboratorio de *Química Inorgánica y Materiales Moleculares*, Facultad de Ingeniería, Universidad Autónoma de Chile, Llano Subercaceaux 2801, San Miguel, Santiago, Chile. E-mail: desmond.macleod@uautonoma.cl

<sup>b</sup>Centro de Investigaciones en Óptica A.C. (CIO), Loma del Bosque 115, Col. Lomas del Campestre, León, Guanajuato, 37150, México. E-mail: plkessler@cio.mx

<sup>c</sup>Facultad de Ingeniería, Arquitectura y Diseño, Universidad San Sebastián, Bellavista 7, Santiago, 8420524, Chile E-mail: \*alvaro.munozc@uss.cl

## Content

Figure S1. Contour plot representation of NICS, z- and y-component of the induced magnetic field,  $B_z^{\text{ind}}$  and  $B_y^{\text{ind}}$ , for Si<sub>20</sub>H<sub>20</sub>, Si<sub>20</sub>H<sub>12</sub>Cl<sub>8</sub>, and, Si<sub>20</sub>Cl<sub>20</sub>. Page 2

Table S1. Coordinates for optimized structures in multiXYZ format. Page 3

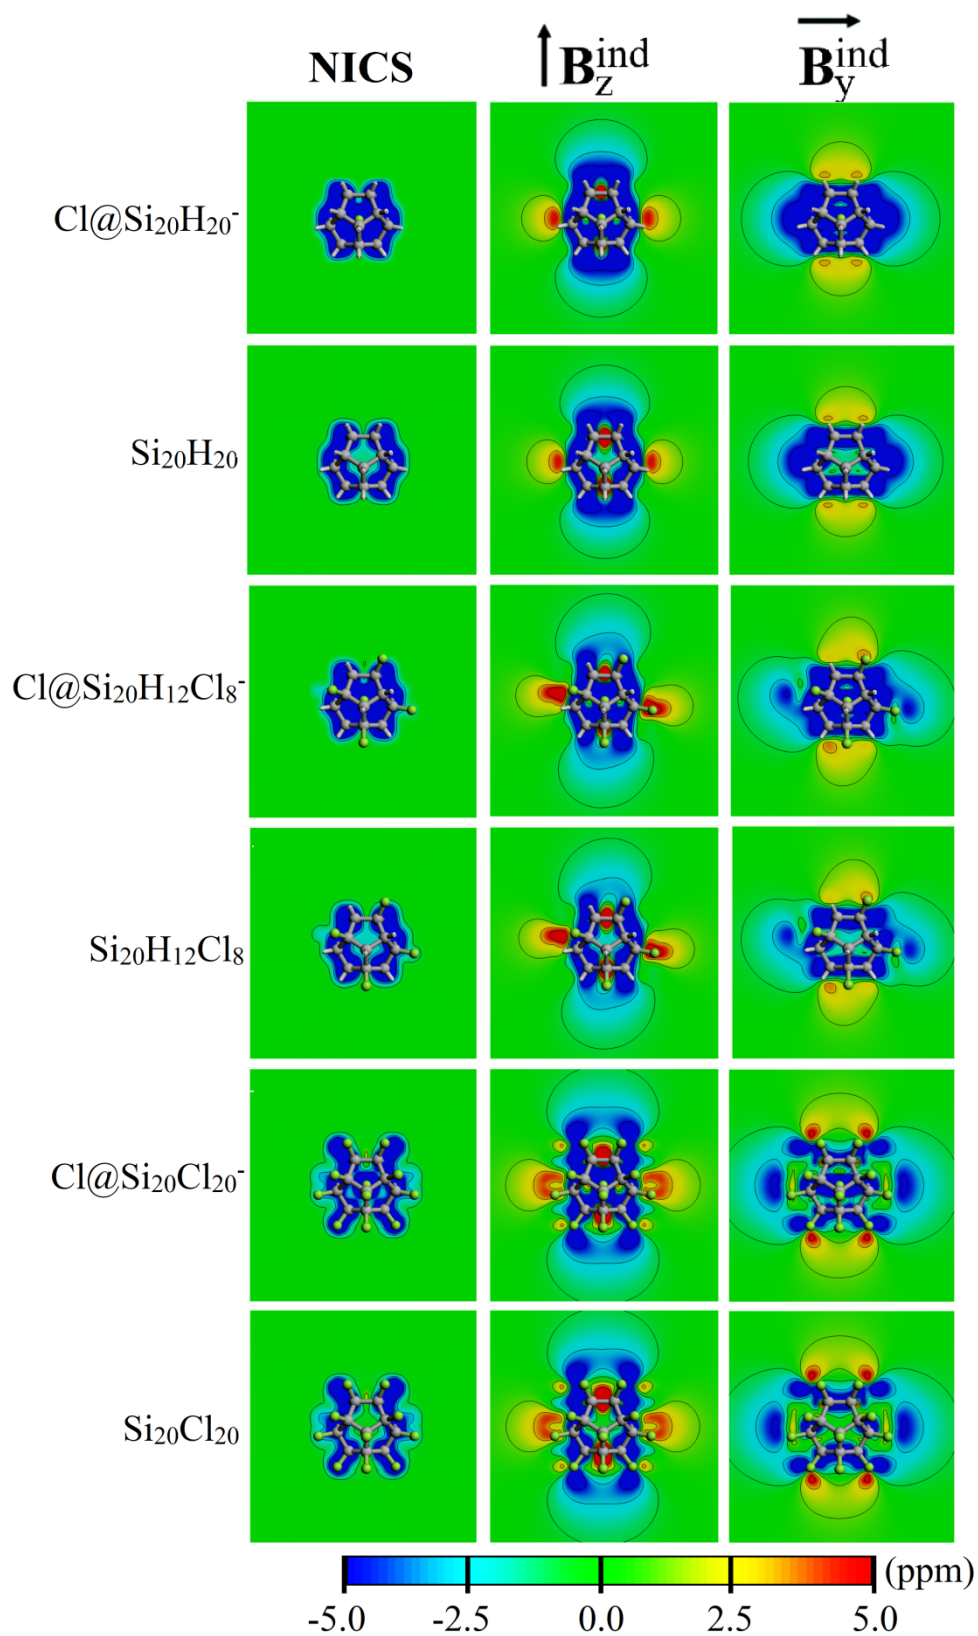

Figure S1. Contour plot representation of NICS, z- and y-component of the induced magnetic field,  $B_z^{\text{ind}}$  and  $B_y^{\text{ind}}$ , for  $\text{Si}_{20}\text{H}_{20}$ ,  $\text{Si}_{20}\text{H}_{12}\text{Cl}_8$ , and,  $\text{Si}_{20}\text{Cl}_{20}$ . In addition, **1**, **2** and **3**, are given for comparison.

Table S1. Coordinates for optimized structures in multiXYZ format. In Angstrom ( $\text{\AA}$ ) units.

```

40
Si20Cl20 q=0
Si      8.678952000      6.870952000      9.046233000
Si     10.552893000      8.301862000      8.921550000
Si      9.789216000     10.522049000      9.152767000
Si      7.448785000     10.442563000      9.396005000
Si      6.758753000      8.193790000      9.341795000
Si      5.801152000      7.675218000     11.432651000
Si      7.138036000      6.004282000     12.439071000
Si      8.919641000      5.517783000     10.957017000
Si     10.913740000      6.104336000     12.053708000
Si     11.932360000      7.822510000     10.783073000
Cl      8.497720000      5.701680000      7.364780000
Cl     11.548296000      8.047370000      7.128142000
Cl     10.298734000     11.681036000      7.521754000
Cl      6.516679000     11.486157000      7.886139000
Cl      5.398294000      7.872014000      7.837821000
Cl      3.836179000      7.112022000     11.176685000
Cl      6.068089000      4.288375000     12.875815000
Cl      8.984799000      3.538144000     10.376970000
Cl     12.114306000      4.445602000     12.269370000
Cl     13.842477000      7.279360000     10.202320000
Si      9.153742000     10.560048000     14.523327000
Si      7.279800000      9.129138000     14.648010000
Si      8.043477000      6.908951000     14.416792000
Si     10.383908000      6.988437000     14.173555000
Si     11.073941000      9.237210000     14.227765000
Si     12.031542000      9.755782000     12.136909000
Si     10.694658000     11.426718000     11.130489000
Si      8.913052000     11.913217000     12.612543000
Si      6.918953000     11.326664000     11.515851000
Si      5.900334000      9.608490000     12.786486000
Cl      9.334974000     11.729320000     16.204779000
Cl      6.284398000      9.383630000     16.441418000
Cl      7.533959000      5.749964000     16.047806000
Cl     11.316014000      5.944843000     15.683421000
Cl     12.434399000      9.558986000     15.731738000
Cl     13.996515000     10.318978000     12.392874000
Cl     11.764604000     13.142625000     10.693745000
Cl      8.847895000     13.892856000     13.192590000
Cl      5.718387000     12.985398000     11.300190000
Cl      3.990217000     10.151640000     13.367240000
41
Cl@Si20Cl20 q=-1
Cl      8.916347000      8.715500000     11.784780000
Si      8.678952000      6.870952000      9.046233000
Si     10.552893000      8.301862000      8.921550000
Si      9.789216000     10.522049000      9.152767000
Si      7.448785000     10.442563000      9.396005000
Si      6.758753000      8.193790000      9.341795000
Si      5.801152000      7.675218000     11.432651000
Si      7.138036000      6.004282000     12.439071000
Si      8.919641000      5.517783000     10.957017000
Si     10.913740000      6.104336000     12.053708000
Si     11.932360000      7.822510000     10.783073000
Cl      8.497720000      5.701680000      7.364780000
Cl     11.548296000      8.047370000      7.128142000
Cl     10.298734000     11.681036000      7.521754000
Cl      6.516679000     11.486157000      7.886139000
Cl      5.398294000      7.872014000      7.837821000
Cl      3.836179000      7.112022000     11.176685000

```

|                    |              |              |              |
|--------------------|--------------|--------------|--------------|
| Cl                 | 6.068089000  | 4.288375000  | 12.875815000 |
| Cl                 | 8.984799000  | 3.538144000  | 10.376970000 |
| Cl                 | 12.114306000 | 4.445602000  | 12.269370000 |
| Cl                 | 13.842477000 | 7.279360000  | 10.202320000 |
| Si                 | 9.153742000  | 10.560048000 | 14.523327000 |
| Si                 | 7.279800000  | 9.129138000  | 14.648010000 |
| Si                 | 8.043477000  | 6.908951000  | 14.416792000 |
| Si                 | 10.383908000 | 6.988437000  | 14.173555000 |
| Si                 | 11.073941000 | 9.237210000  | 14.227765000 |
| Si                 | 12.031542000 | 9.755782000  | 12.136909000 |
| Si                 | 10.694658000 | 11.426718000 | 11.130489000 |
| Si                 | 8.913052000  | 11.913217000 | 12.612543000 |
| Si                 | 6.918953000  | 11.326664000 | 11.515851000 |
| Si                 | 5.900334000  | 9.608490000  | 12.786486000 |
| Cl                 | 9.334974000  | 11.729320000 | 16.204779000 |
| Cl                 | 6.284398000  | 9.383630000  | 16.441418000 |
| Cl                 | 7.533959000  | 5.749964000  | 16.047806000 |
| Cl                 | 11.316014000 | 5.944843000  | 15.683421000 |
| Cl                 | 12.434399000 | 9.558986000  | 15.731738000 |
| Cl                 | 13.996515000 | 10.318978000 | 12.392874000 |
| Cl                 | 11.764604000 | 13.142625000 | 10.693745000 |
| Cl                 | 8.847895000  | 13.892856000 | 13.192590000 |
| Cl                 | 5.718387000  | 12.985398000 | 11.300190000 |
| Cl                 | 3.990217000  | 10.151640000 | 13.367240000 |
| 40                 |              |              |              |
| Si20H12C18 q=0     |              |              |              |
| Si                 | 10.319729000 | 16.112692000 | 3.801284000  |
| Si                 | 8.504298000  | 14.683946000 | 4.267056000  |
| H                  | 7.268625000  | 15.073812000 | 3.511368000  |
| Si                 | 9.182919000  | 12.482547000 | 3.785238000  |
| H                  | 8.275362000  | 11.822874000 | 2.789733000  |
| Si                 | 11.395840000 | 12.616741000 | 2.999665000  |
| Si                 | 12.113708000 | 14.858035000 | 2.943950000  |
| H                  | 12.478826000 | 15.289438000 | 1.554566000  |
| Si                 | 11.037363000 | 17.159641000 | 5.776026000  |
| H                  | 10.955978000 | 18.653158000 | 5.663371000  |
| Si                 | 8.195927000  | 14.808453000 | 6.605279000  |
| Si                 | 9.262814000  | 11.294509000 | 5.827060000  |
| Si                 | 12.801816000 | 11.385700000 | 4.420160000  |
| H                  | 13.513785000 | 10.279031000 | 3.700084000  |
| Si                 | 13.932386000 | 15.064637000 | 4.426845000  |
| H                  | 15.158742000 | 15.595385000 | 3.745547000  |
| Si                 | 9.702096000  | 16.359640000 | 7.536825000  |
| H                  | 8.990750000  | 17.471548000 | 8.249301000  |
| Si                 | 8.571890000  | 12.694604000 | 7.576270000  |
| H                  | 7.345113000  | 12.168776000 | 8.260756000  |
| Si                 | 11.458928000 | 10.593472000 | 6.167587000  |
| H                  | 11.537721000 | 9.099262000  | 6.273199000  |
| Si                 | 14.295168000 | 12.942823000 | 5.375551000  |
| Si                 | 13.230955000 | 16.453724000 | 6.201684000  |
| Si                 | 11.085814000 | 15.123354000 | 8.995205000  |
| Si                 | 10.393321000 | 12.871087000 | 9.056937000  |
| H                  | 10.037880000 | 12.427231000 | 10.444939000 |
| Si                 | 12.182533000 | 11.620248000 | 8.153918000  |
| Si                 | 13.979606000 | 13.063820000 | 7.705528000  |
| H                  | 15.215313000 | 12.663893000 | 8.455934000  |
| Si                 | 13.310248000 | 15.255309000 | 8.232141000  |
| H                  | 14.218005000 | 15.900263000 | 9.237118000  |
| Cl                 | 9.720710000  | 17.624054000 | 2.460126000  |
| Cl                 | 11.466983000 | 11.836914000 | 1.047208000  |
| Cl                 | 6.248920000  | 15.473646000 | 7.015338000  |
| Cl                 | 8.125620000  | 9.552720000  | 5.928461000  |
| Cl                 | 16.257152000 | 12.301874000 | 4.964378000  |
| Cl                 | 14.392437000 | 18.190097000 | 6.337850000  |
| Cl                 | 10.888667000 | 15.930070000 | 10.936296000 |
| Cl                 | 12.845367000 | 10.090070000 | 9.420641000  |
| 41                 |              |              |              |
| Cl@Si20H12C18 q=-1 |              |              |              |

|                                      |              |              |              |
|--------------------------------------|--------------|--------------|--------------|
| Cl                                   | 11.255282000 | 13.879560000 | 5.974592000  |
| Si                                   | 10.319729000 | 16.112692000 | 3.801284000  |
| Si                                   | 8.504298000  | 14.683946000 | 4.267056000  |
| H                                    | 7.268625000  | 15.073812000 | 3.511368000  |
| Si                                   | 9.182919000  | 12.482547000 | 3.785238000  |
| H                                    | 8.275362000  | 11.822874000 | 2.789733000  |
| Si                                   | 11.395840000 | 12.616741000 | 2.999665000  |
| Si                                   | 12.113708000 | 14.858035000 | 2.943950000  |
| H                                    | 12.478826000 | 15.289438000 | 1.554566000  |
| Si                                   | 11.037363000 | 17.159641000 | 5.776026000  |
| H                                    | 10.955978000 | 18.653158000 | 5.663371000  |
| Si                                   | 8.195927000  | 14.808453000 | 6.605279000  |
| Si                                   | 9.262814000  | 11.294509000 | 5.827060000  |
| Si                                   | 12.801816000 | 11.385700000 | 4.420160000  |
| H                                    | 13.513785000 | 10.279031000 | 3.700084000  |
| Si                                   | 13.932386000 | 15.064637000 | 4.426845000  |
| H                                    | 15.158742000 | 15.595385000 | 3.745547000  |
| Si                                   | 9.702096000  | 16.359640000 | 7.536825000  |
| H                                    | 8.990750000  | 17.471548000 | 8.249301000  |
| Si                                   | 8.571890000  | 12.694604000 | 7.576270000  |
| H                                    | 7.345113000  | 12.168776000 | 8.260756000  |
| Si                                   | 11.458928000 | 10.593472000 | 6.167587000  |
| H                                    | 11.537721000 | 9.099262000  | 6.273199000  |
| Si                                   | 14.295168000 | 12.942823000 | 5.375551000  |
| Si                                   | 13.230955000 | 16.453724000 | 6.201684000  |
| Si                                   | 11.085814000 | 15.123354000 | 8.995205000  |
| Si                                   | 10.393321000 | 12.871087000 | 9.056937000  |
| H                                    | 10.037880000 | 12.427231000 | 10.444939000 |
| Si                                   | 12.182533000 | 11.620248000 | 8.153918000  |
| Si                                   | 13.979606000 | 13.063820000 | 7.705528000  |
| H                                    | 15.215313000 | 12.663893000 | 8.455934000  |
| Si                                   | 13.310248000 | 15.255309000 | 8.232141000  |
| H                                    | 14.218005000 | 15.900263000 | 9.237118000  |
| Cl                                   | 9.720710000  | 17.624054000 | 2.460126000  |
| Cl                                   | 11.466983000 | 11.836914000 | 1.047208000  |
| Cl                                   | 6.248920000  | 15.473646000 | 7.015338000  |
| Cl                                   | 8.125620000  | 9.552720000  | 5.928461000  |
| Cl                                   | 16.257152000 | 12.301874000 | 4.964378000  |
| Cl                                   | 14.392437000 | 18.190097000 | 6.337850000  |
| Cl                                   | 10.888667000 | 15.930070000 | 10.936296000 |
| Cl                                   | 12.845367000 | 10.090070000 | 9.420641000  |
| 40                                   |              |              |              |
| Si <sub>20</sub> H <sub>20</sub> q=0 |              |              |              |
| Si                                   | -1.829376000 | 7.857532000  | 2.681197000  |
| H                                    | -2.254735000 | 8.577530000  | 3.793876000  |
| Si                                   | -0.039048000 | 6.414871000  | 3.137229000  |
| H                                    | 0.473614000  | 6.579104000  | 4.426189000  |
| Si                                   | -0.724869000 | 4.206607000  | 2.680048000  |
| H                                    | -0.657798000 | 3.301004000  | 3.736393000  |
| Si                                   | -2.965796000 | 4.295049000  | 1.949056000  |
| H                                    | -3.819652000 | 3.534994000  | 2.740021000  |
| Si                                   | -3.637288000 | 6.557161000  | 1.935452000  |
| H                                    | -4.753991000 | 6.737640000  | 2.759182000  |
| Si                                   | -1.177120000 | 9.280407000  | 0.913021000  |
| H                                    | -1.195026000 | 10.635733000 | 1.264625000  |
| Si                                   | 1.009082000  | 8.691121000  | 0.279942000  |
| H                                    | 1.829913000  | 9.818566000  | 0.344898000  |
| Si                                   | 1.718659000  | 6.939394000  | 1.659150000  |
| H                                    | 2.771793000  | 7.264121000  | 2.529251000  |
| Si                                   | 2.120075000  | 5.064161000  | 0.289523000  |
| H                                    | 3.348193000  | 4.422422000  | 0.498186000  |
| Si                                   | 0.593067000  | 3.381353000  | 0.922218000  |
| H                                    | 1.282016000  | 2.197462000  | 1.245464000  |
| Si                                   | -0.178013000 | 4.378094000  | -2.681197000 |
| H                                    | 0.247347000  | 3.658096000  | -3.793876000 |
| Si                                   | -1.968340000 | 5.820755000  | -3.137229000 |
| H                                    | -2.481003000 | 5.656522000  | -4.426189000 |
| Si                                   | -1.282519000 | 8.029020000  | -2.680048000 |

|            |              |              |              |
|------------|--------------|--------------|--------------|
| H          | -1.349590000 | 8.934623000  | -3.736393000 |
| Si         | 0.958408000  | 7.940578000  | -1.949056000 |
| H          | 1.812263000  | 8.700633000  | -2.740021000 |
| Si         | 1.629899000  | 5.678465000  | -1.935452000 |
| H          | 2.746603000  | 5.497986000  | -2.759182000 |
| Si         | -0.830268000 | 2.955220000  | -0.913021000 |
| H          | -0.812362000 | 1.599893000  | -1.264625000 |
| Si         | -3.016470000 | 3.544505000  | -0.279942000 |
| H          | -3.837301000 | 2.417060000  | -0.344898000 |
| Si         | -3.726048000 | 5.296233000  | -1.659150000 |
| H          | -4.779182000 | 4.971505000  | -2.529251000 |
| Si         | -4.127464000 | 7.171465000  | -0.289523000 |
| H          | -5.355582000 | 7.813204000  | -0.498186000 |
| Si         | -2.600455000 | 8.854274000  | -0.922218000 |
| H          | -3.289405000 | 10.038164000 | -1.245464000 |
| 41         |              |              |              |
| Cl@Si20H20 |              |              |              |
| Cl         | -1.003694000 | 6.117813000  | 0.000000000  |
| Si         | -1.829376000 | 7.857532000  | 2.681197000  |
| H          | -2.254735000 | 8.577530000  | 3.793876000  |
| Si         | -0.039048000 | 6.414871000  | 3.137229000  |
| H          | 0.473614000  | 6.579104000  | 4.426189000  |
| Si         | -0.724869000 | 4.206607000  | 2.680048000  |
| H          | -0.657798000 | 3.301004000  | 3.736393000  |
| Si         | -2.965796000 | 4.295049000  | 1.949056000  |
| H          | -3.819652000 | 3.534994000  | 2.740021000  |
| Si         | -3.637288000 | 6.557161000  | 1.935452000  |
| H          | -4.753991000 | 6.737640000  | 2.759182000  |
| Si         | -1.177120000 | 9.280407000  | 0.913021000  |
| H          | -1.195026000 | 10.635733000 | 1.264625000  |
| Si         | 1.009082000  | 8.691121000  | 0.279942000  |
| H          | 1.829913000  | 9.818566000  | 0.344898000  |
| Si         | 1.718659000  | 6.939394000  | 1.659150000  |
| H          | 2.771793000  | 7.264121000  | 2.529251000  |
| Si         | 2.120075000  | 5.064161000  | 0.289523000  |
| H          | 3.348193000  | 4.422422000  | 0.498186000  |
| Si         | 0.593067000  | 3.381353000  | 0.922218000  |
| H          | 1.282016000  | 2.197462000  | 1.245464000  |
| Si         | -0.178013000 | 4.378094000  | -2.681197000 |
| H          | 0.247347000  | 3.658096000  | -3.793876000 |
| Si         | -1.968340000 | 5.820755000  | -3.137229000 |
| H          | -2.481003000 | 5.656522000  | -4.426189000 |
| Si         | -1.282519000 | 8.029020000  | -2.680048000 |
| H          | -1.349590000 | 8.934623000  | -3.736393000 |
| Si         | 0.958408000  | 7.940578000  | -1.949056000 |
| H          | 1.812263000  | 8.700633000  | -2.740021000 |
| Si         | 1.629899000  | 5.678465000  | -1.935452000 |
| H          | 2.746603000  | 5.497986000  | -2.759182000 |
| Si         | -0.830268000 | 2.955220000  | -0.913021000 |
| H          | -0.812362000 | 1.599893000  | -1.264625000 |
| Si         | -3.016470000 | 3.544505000  | -0.279942000 |
| H          | -3.837301000 | 2.417060000  | -0.344898000 |
| Si         | -3.726048000 | 5.296233000  | -1.659150000 |
| H          | -4.779182000 | 4.971505000  | -2.529251000 |
| Si         | -4.127464000 | 7.171465000  | -0.289523000 |
| H          | -5.355582000 | 7.813204000  | -0.498186000 |
| Si         | -2.600455000 | 8.854274000  | -0.922218000 |
| H          | -3.289405000 | 10.038164000 | -1.245464000 |
